# Supplementary material
Source: Springer Nature journal article supplement (https://www.springermedizin.de/resource/supplementary/12943_2011_855_MOESM2_ESM.pdf/9551856)

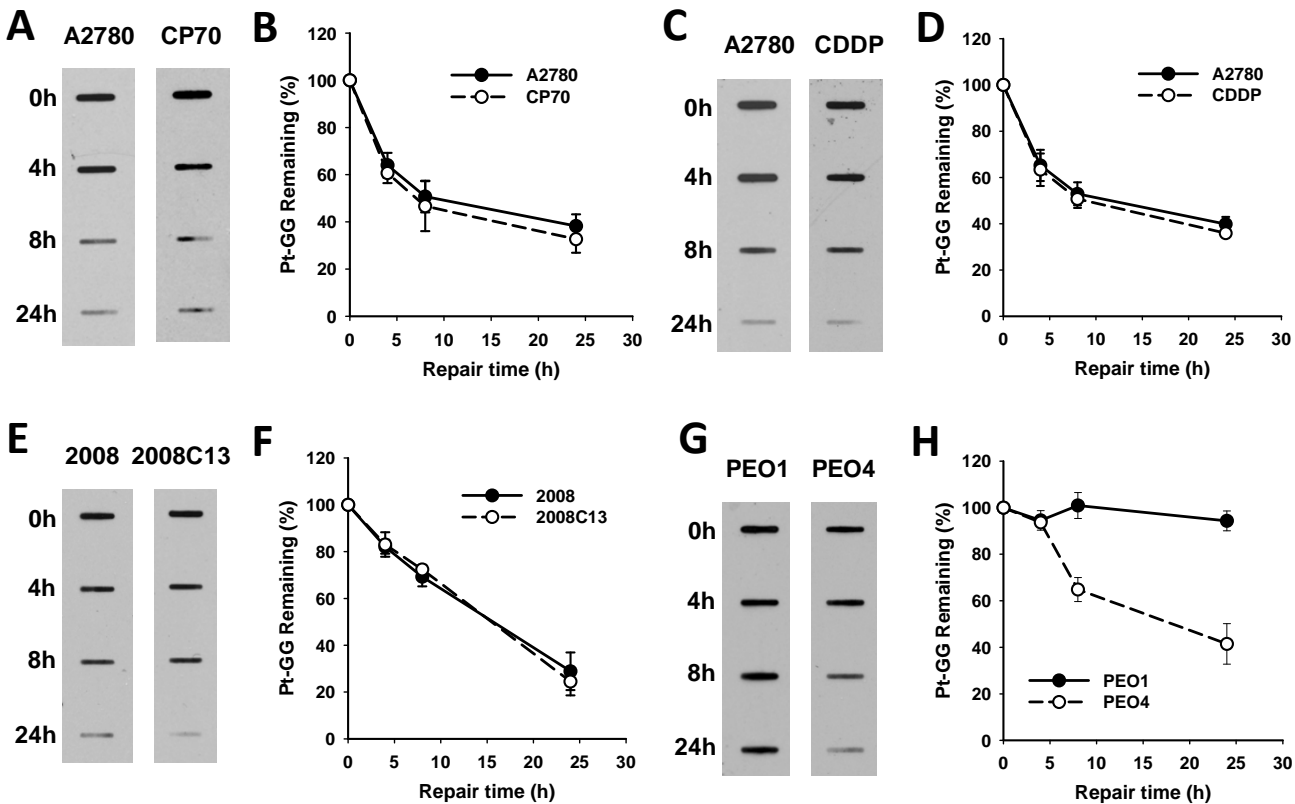

Supplement: MOESM2 [file 9551856]
